# Supplementary material for: Origin of wiring specificity in an olfactory map revealed by neuron type–specific, time-lapse imaging of dendrite targeting
Source: eLife. 2023 Mar 28;12:e85521. doi: 10.7554/eLife.85521 (PMC10195080; doi:10.7554/eLife.85521)
Supplement: Figure 3—figure supplement 3—source data 1. [file elife-85521-fig3-figsupp3-data1.xlsx]

## Sheet: fig 3 - fig supplement 3
Fig 3 - fig supplement 3F
		Exploring volume of developing dendrites of indicated adPNs (um3)							No. of terminal branches of indicated adPNs
	0h	DL1	Middle-born	Late-born				0h	DL1	Middle-born	Late-born
		2030.38	866.997						53	29
		1336.29	651.412						44	25
		1300.6	401.106						52	26
		1698.6	724.291						45	21
			720.654							32
	average	1591.47	672.892					average	48.5	26.6
	N	4	5					N	4	5
	sem	171.718	76.462					sem	2.32737	1.86011
	t test		0.00114778					t test		0.000142484
	6h	1700.39	1341.84	416.3				6h	58	39	12
		1566	1354.61	314.579					78	37	24
		1469.28	1263.38	630.83					40	44	25
		1811.29	1729.52	523.3					59	37	19
			1408.81							40
	average	1636.74	1419.63	471.252				average	58.75	39.4	20
	N	4	5	4				N	4	5	4
	sem	75.0367	80.8828	68.1544				sem	7.76075	1.28841	2.97209
	t test		0.0959907	5.47829e-05				t test		0.0274666	0.000338813
Fig 3 - fig supplement 3G
		Exploring volume of developing dendrites of indicated lPNs (um3)							No. of terminal branches of indicated PNs
	0h		Middle-born	Late-born				0h		Middle-born	Late-born
			457.37							22
			785.581							28
			514.334							19
			756							18
	average		628.321					average		21.75
	N		4					N		4
	sem		83.2916					sem		2.25
	6h		858.649	494.111				6h		27	16
			838.589	418.59						36	18
			1132.28	546.744						33	9
			1045.43	453.305						37	8
	average		968.738	478.188				average		33.25	12.75
	N		4	4				N		4	4
	sem		71.6981	27.575				sem		2.25	2.49583
	t test			0.000693777				t test			0.000883768
