# Supplementary material for: Origin of wiring specificity in an olfactory map revealed by neuron type–specific, time-lapse imaging of dendrite targeting
Source: eLife. 2023 Mar 28;12:e85521. doi: 10.7554/eLife.85521 (PMC10195080; doi:10.7554/eLife.85521)
Supplement: Figure 5—figure supplement 1—source data 1. [file elife-85521-fig5-figsupp1-data1.xlsx]

## Sheet: fig 5 - fig supplement 1
Fig 5 fig supp 1C
	Overlapping/total core targeting volume (%)					Overlapping/total exploring volume (%)
		Overlap (core)	total	overlap %		Overlap (core)	total	overlap %		distance between c.m.
	00:00:00	7.738	170.003	4.55168		84.677	330.845	25.5942		3.21395
	00:20:00	10.264	164.668	6.23315		74.534	360.167	20.6943		3.30351
	00:40:00	11.119	185.116	6.0065		68.873	367.336	18.7493		3.48697
	01:00:00	17.512	204.58	8.55998		73.19	381.143	19.2028		3.4576
	01:20:00	16.658	213.787	7.79187		84.024	390.47	21.5187		3.63679
	01:40:00	20.161	210.202	9.59125		123.735	413.726	29.9075		3.56955
	02:00:00	19.632	192.854	10.1797		117.177	380.652	30.7832		3.70829
	02:20:00	17.269	176.236	9.79879		116.566	388.637	29.9935		3.66416
	02:40:00	22.849	185.114	12.3432		105.284	389.777	27.0113		3.67577
	03:00:00	22.971	194.602	11.8041		74.086	333.895	22.1884		3.83126
	03:20:00	26.801	209.674	12.7822		74.331	341.145	21.7887		3.68788
	03:40:00	11.281	208.571	5.40871		58.364	353.527	16.5091		4.14813
	04:00:00	14.459	201.121	7.1892		59.628	337.849	17.6493		3.49331
	04:20:00	7.861	205.967	3.81663		42.276	322.044	13.1274		4.03345
	04:40:00	12.83	207.922	6.17058		62.234	333.53	18.6592		3.95741
	05:00:00	8.716	211.262	4.12568		50.952	348.275	14.6298		4.42414
	05:20:00	5.825	202.181	2.88108		53.273	339.802	15.6777		4.39595
	05:40:00	4.887	207.473	2.35549		45.617	348.967	13.072		4.53154
	06:00:00	1.059	211.302	0.501178		34.62	344.202	10.058		4.80879
	06:20:00	3.055	232.849	1.31201		29.243	350.922	8.33319		5.18738
	06:40:00	1.181	221.77	0.532534		28.266	350.799	8.05761		5.42847
	07:00:00	2.525	216.109	1.16839		40.73	381.631	10.6726		4.98784
	07:20:00	0.652	186.336	0.349906		48.346	375.523	12.8743		4.98741
	07:40:00	2.037	218.635	0.93169		47.124	400.449	11.7678		5.04546
	08:00:00	0	183.851	0		43.948	419.349	10.4801		5.35509
Fig 5 fig supp 1D
	overlapping/total - core (%)			overlapping/total - exploring (%)			distance between cm
	00:00:00	08:00:00		00:00:00	08:00:00		00:00:00	08:00:00
	4.55168	0		25.5942	10.4801		3.21395	5.35509
	11.2119	1.43136		34.4426	10.2979		3.04	4.39
	6.6563	2.415		28.2432	14.8675		4.18	5.26
	14.0146	1.56917		33.0981	12.3374		5.48	6.51
	8.39216	0		25.7336	10.8146		3.91	4.46
	16.7068	0		34.3269	10.5305		4.49	5.98
t test		0.000660786			1.56132e-06			0.02863
