# Supplementary material for: Origin of wiring specificity in an olfactory map revealed by neuron type–specific, time-lapse imaging of dendrite targeting
Source: eLife. 2023 Mar 28;12:e85521. doi: 10.7554/eLife.85521 (PMC10195080; doi:10.7554/eLife.85521)
Supplement: Figure 6—source data 1. [file elife-85521-fig6-data1.xlsx]

## Sheet: fig 6
Fig 6C						Fig 6D
	Dendritic volume in indicated direction (%)						Dendritic volume in indicated direction (%)
time	DL	DM	VM	VL			DL			DM			VM			VL
00:00:00	42.1698	24.8078	17.5181	15.5044			00:00:00	18:00:00		00:00:00	18:00:00		00:00:00	18:00:00		00:00:00	18:00:00
00:20:00	29.2681	29.9549	8.53716	32.2398			42.1698	100		24.8078	0		17.5181	0		15.5044	0
00:40:00	37.028	26.8464	10.9912	25.1344			13.2251	100		16.1181	0		33.428	0		37.2288	0
01:00:00	40.495	8.94615	22.4438	28.1151			21.2475	100		26.3917	0		10.1344	0		42.2264	0
01:20:00	36.8857	14.355	7.59149	41.1678		t test		0.000991553			0.00216118			0.0414549			0.0181616
01:40:00	26.8785	31.2128	12.3101	29.5986
02:00:00	33.2701	23.7731	19.7576	23.1992
02:20:00	37.8267	20.5825	12.0822	29.5086		Fig 6E
02:40:00	31.341	13.6317	15.8968	39.1304			Dendritic volume in indicated direction (%) over entire imaging time
03:00:00	45.9845	14.4901	11.4602	28.0652				DL1 PN#1	DL1 PN#2	DL1 PN#3
03:20:00	43.3631	8.07789	15.3045	33.2545			DL	66.5445	69.3093	81.7101
03:40:00	30.5936	35.9014	10.984	22.521			DM	15.0694	6.94823	6.16393
04:00:00	28.4455	25.3009	14.3386	31.9149			VM	5.92088	3.13608	1.79357
04:20:00	38.481	18.9223	16.4618	26.1349			VL	12.4652	20.6064	10.3324
04:40:00	43.2716	11.3238	11.3238	34.0807
05:00:00	44.1782	21.6349	9.12455	25.0623
05:20:00	23.9916	28.2614	13.6906	34.0563		Fig 6F
05:40:00	41.7671	34.1342	6.75571	17.343			No. of bulk events
06:00:00	34.4623	34.7105	10.1596	20.6676			extension			retraction
06:20:00	48.1534	22.9446	5.95737	22.9446			initial	final		initial	final
06:40:00	33.5313	27.2257	5.1927	34.0503			5	2		4	2
07:00:00	57.3553	22.1437	9.23325	11.2678			4.1	2.1		4.1	2.1
07:20:00	48.0923	29.8803	8.72313	13.3042			4	2		3	2
07:40:00	55.5008	25.2155	13.5357	5.7481		t test		0.0018743			0.00914076
08:00:00	86.7149	9.16608	2.88257	1.23647
08:20:00	65.8912	20.6785	13.4303	0
08:40:00	69.1179	30.8821	0	0
09:00:00	67.6453	32.3547	0	0
09:20:00	68.6484	25.7759	5.57572	0
09:40:00	68.8732	27.3898	3.73702	0
10:00:00	91.1892	8.81081	0	0
10:20:00	65.8035	30.9293	3.26721	0
10:40:00	70.9142	29.0858	0	0
11:00:00	73.06	26.94	0	0
11:20:00	64.1869	35.8131	0	0
11:40:00	66.3906	33.6094	0	0
12:00:00	80.6035	19.3965	0	0
12:20:00	91.9037	8.09635	0	0
12:40:00	86.8698	13.1302	0	0
13:00:00	92.0386	7.96143	0	0
13:20:00	97.7565	2.24349	0	0
13:40:00	100	0	0	0
14:00:00	100	0	0	0
14:20:00	94.3333	5.66668	0	0
14:40:00	99.3989	0.601117	0	0
15:00:00	100	0	0	0
15:20:00	100	0	0	0
15:40:00	100	0	0	0
16:00:00	100	0	0	0
16:20:00	100	0	0	0
16:40:00	100	0	0	0
17:00:00	100	0	0	0
17:20:00	100	0	0	0
17:40:00	100	0	0	0
18:00:00	100	0	0	0
18:20:00	100	0	0	0
18:40:00	100	0	0	0
19:00:00	100	0	0	0
19:20:00	100	0	0	0
19:40:00	100	0	0	0
20:00:00	100	0	0	0
20:20:00	100	0	0	0
20:40:00	100	0	0	0
21:00:00	100	0	0	0

## Sheet: fig 6 - fig supplement 1
Fig 6 - fig supp 1D						Fig 6 - fig supp 1E
	Dendritic volume in indicated direction (%)						Dendritic volume in indicated direction (%)
time	DL	DM	VM	VL		time	DL	DM	VM	VL
00:00:00	21.2475	26.3917	10.1344	42.2264		00:00:00	13.2251	16.1181	33.428	37.2288
00:20:00	24.3781	24.4452	10.7777	40.3991		00:20:00	47.7593	27.5085	4.39116	20.341
00:40:00	20.4724	17.2572	19.9037	42.3668		00:40:00	36.3986	28.7524	15.5848	19.2641
01:00:00	32.3378	16.4985	20.9792	30.1845		01:00:00	42.8135	27.1326	9.53046	20.5235
01:20:00	35.3635	24.4311	15.9027	24.3028		01:20:00	58.2891	15.9962	13.932	11.7827
01:40:00	34.1972	43.1441	7.35825	15.3004		01:40:00	57.7963	33.0627	1.6137	7.52731
02:00:00	29.5625	26.7876	10.4803	33.1697		02:00:00	34.9137	38.6866	3.44745	22.9522
02:20:00	26.8556	20.9944	4.82852	47.3215		02:20:00	34.8123	22.9466	3.32194	38.9191
02:40:00	32.3105	10.9822	2.45111	54.2561		02:40:00	15.7088	51.4721	3.22647	29.5926
03:00:00	36.7731	16.8321	7.76084	38.6339		03:00:00	12.0058	41.6105	4.44211	41.9416
03:20:00	34.6353	18.2898	3.42006	43.6548		03:20:00	23.4522	36.2328	0	40.3151
03:40:00	46.6411	2.93901	3.3268	47.0931		03:40:00	42.44	16.2113	0	41.3488
04:00:00	37.7551	0	4.79011	57.4548		04:00:00	33.4234	0	0	66.5766
04:20:00	42.548	0	0	57.452		04:20:00	35.1351	0	0	64.8649
04:40:00	51.238	0	0	48.762		04:40:00	71.634	0	0	28.366
05:00:00	30.1191	0	0	69.8809		05:00:00	43.4298	0	0	56.5702
05:20:00	76.1554	0	0	23.8446		05:20:00	65.2734	0	0	34.7266
05:40:00	80.9142	0	0	19.0858		05:40:00	48.588	10.7839	0	40.6282
06:00:00	85.6154	0	0	14.3846		06:00:00	45.5414	0	0	54.4586
06:20:00	93.9296	1.00434	0	5.06608		06:20:00	34.9573	0	0	65.0427
06:40:00	94.144	0	0	5.85602		06:40:00	60.4553	4.99981	4.54596	29.9989
07:00:00	88.5898	0	0	11.4102		07:00:00	78.4024	0	0	21.5976
07:20:00	86.8812	0	0	13.1188		07:20:00	87.501	0	0	12.499
07:40:00	94.0108	0	0	5.9892		07:40:00	88.3263	0	0	11.6737
08:00:00	98.2441	0	0	1.75593		08:00:00	100	0	0	0
08:20:00	98.2917	0	0	1.70834		08:20:00	100	0	0	0
08:40:00	100	0	0	0		08:40:00	100	0	0	0
09:00:00	100	0	0	0		09:00:00	100	0	0	0
09:20:00	100	0	0	0		09:20:00	100	0	0	0
09:40:00	100	0	0	0		09:40:00	100	0	0	0
10:00:00	100	0	0	0		10:00:00	100	0	0	0
10:20:00	100	0	0	0		10:20:00	100	0	0	0
10:40:00	100	0	0	0		10:40:00	100	0	0	0
11:00:00	100	0	0	0		11:00:00	100	0	0	0
11:20:00	100	0	0	0		11:20:00	100	0	0	0
11:40:00	100	0	0	0		11:40:00	100	0	0	0
12:00:00	100	0	0	0		12:00:00	100	0	0	0
12:20:00	100	0	0	0		12:20:00	100	0	0	0
12:40:00	93.6308	0	0	6.36917		12:40:00	100	0	0	0
13:00:00	100	0	0	0		13:00:00	100	0	0	0
13:20:00	100	0	0	0		13:20:00	100	0	0	0
13:40:00	100	0	0	0		13:40:00	100	0	0	0
14:00:00	100	0	0	0		14:00:00	100	0	0	0
14:20:00	100	0	0	0		14:20:00	100	0	0	0
14:40:00	100	0	0	0		14:40:00	100	0	0	0
15:00:00	100	0	0	0		15:00:00	100	0	0	0
15:20:00	100	0	0	0		15:20:00	100	0	0	0
15:40:00	100	0	0	0		15:40:00	100	0	0	0
16:00:00	100	0	0	0		16:00:00	100	0	0	0
16:20:00	100	0	0	0		16:20:00	100	0	0	0
16:40:00	100	0	0	0		16:40:00	100	0	0	0
17:00:00	100	0	0	0		17:00:00	100	0	0	0
17:20:00	100	0	0	0		17:20:00	100	0	0	0
17:40:00	100	0	0	0		17:40:00	100	0	0	0
18:00:00	100	0	0	0		18:00:00	100	0	0	0
