# Supplementary material for: Origin of wiring specificity in an olfactory map revealed by neuron type–specific, time-lapse imaging of dendrite targeting
Source: eLife. 2023 Mar 28;12:e85521. doi: 10.7554/eLife.85521 (PMC10195080; doi:10.7554/eLife.85521)
Supplement: Figure 7—source data 1. [file elife-85521-fig7-data1.xlsx]

## Sheet: fig 7E1
fig 7E1
	Abundance (&) of stable branches
	3h									6h								12h
	DL	DM	VM	VL						DL	DM	VM	VL					DL	DM	VM	VL
	44.4444	23.5294	6.25	33.3333						50	47.0588	52.9412	47.0588					72.2222	64.7059	81.25	77.7778
	30.7692	33.3333	16.6667	57.1429						41.6667	46.1538	33.3333	41.1765					83.3333	91.6667	90.9091	69.2308
	35.7143	40	13.3333	46.6667						41.6667	58.3333	33.3333	58.3333					84.6154	71.4286	69.2308	92.3077
	46.6667	26.6667	6.66667	43.75
average	39.3987	30.8824	10.7292	45.2232					average	44.4444	50.5153	39.8693	48.8562				average	80.057	75.9337	80.4633	79.7721
count	4	4	4	4					count	3	3	3	3				count	3	3	3	3
sd	7.44593	7.32522	5.11867	9.79287					sd	4.81125	6.78569	11.3206	8.71851				sd	6.81531	14.0336	10.8606	11.667
sem	3.72296	3.66261	2.55934	4.89644					sem	2.77778	3.91772	6.53595	5.03363				sem	3.93482	8.10233	6.27034	6.73595
t test		0.154081	0.00071737	0.380238					t test		0.274841	0.554508	0.485652				t test		0.670879	0.958861	0.972617
		n.s.	*	n.s.							n.s.	n.s.	n.s.						n.s.	n.s.	n.s.
	Anova: Single Factor								Anova: Single Factor								Anova: Single Factor
	SUMMARY								SUMMARY								SUMMARY
	Groups	Count	Sum	Average	Variance				Groups	Count	Sum	Average	Variance				Groups	Count	Sum	Average	Variance
	Column 1	4	157.595	39.3987	55.4418				Column 1	3	133.333	44.4444	23.1481				Column 1	3	240.171	80.057	46.4485
	Column 2	4	123.529	30.8824	53.6588				Column 2	3	151.546	50.5153	46.0456				Column 2	3	227.801	75.9337	196.943
	Column 3	4	42.9167	10.7292	26.2008				Column 3	3	119.608	39.8693	128.156				Column 3	3	241.39	80.4633	117.952
	Column 4	4	180.893	45.2232	95.9004				Column 4	3	146.569	48.8562	76.0124				Column 4	3	239.316	79.7721	136.119
	ANOVA								ANOVA								ANOVA
	Source of Variation	SS	df	MS	F	P-value	F crit		Source of Variation	SS	df	MS	F	P-value	F crit		Source of Variation	SS	df	MS	F	P-value	F crit
	Between Groups	2730.04	3	910.014	15.7441	0.000184301	3.49029		Between Groups	205.581	3	68.5269	1.00273	0.440031	4.06618		Between Groups	39.7317	3	13.2439	0.106492	0.953937	4.06618
	Within Groups	693.606	12	57.8005					Within Groups	546.724	8	68.3405					Within Groups	994.925	8	124.366
	Total	3423.65	15						Total	752.305	11						Total	1034.66	11
									Anova: Single Factor								Anova: Single Factor
									SUMMARY								SUMMARY
									Groups	Count	Sum	Average	Variance				Groups	Count	Sum	Average	Variance
									Column 1	4	157.595	39.3987	55.4418				Column 1	3	133.333	44.4444	23.1481
									Column 2	4	123.529	30.8824	53.6588				Column 2	3	151.546	50.5153	46.0456
									Column 3	4	42.9167	10.7292	26.2008				Column 3	3	119.608	39.8693	128.156
									Column 4	4	180.893	45.2232	95.9004				Column 4	3	146.569	48.8562	76.0124
									Column 5	0	0	#DIV/0!	#DIV/0!				Column 5	0	0	#DIV/0!	#DIV/0!
									Column 6	0	0	#DIV/0!	#DIV/0!				Column 6	0	0	#DIV/0!	#DIV/0!
									Column 7	0	0	#DIV/0!	#DIV/0!				Column 7	0	0	#DIV/0!	#DIV/0!
									Column 8	0	0	#DIV/0!	#DIV/0!				Column 8	0	0	#DIV/0!	#DIV/0!
									Column 9	0	0	#DIV/0!	#DIV/0!				Column 9	3	240.171	80.057	46.4485
									Column 10	3	133.333	44.4444	23.1481				Column 10	3	227.801	75.9337	196.943
									Column 11	3	151.546	50.5153	46.0456				Column 11	3	241.39	80.4633	117.952
									Column 12	3	119.608	39.8693	128.156				Column 12	3	239.316	79.7721	136.119
									Column 13	3	146.569	48.8562	76.0124
																	ANOVA
									ANOVA								Source of Variation	SS	df	MS	F	P-value	F crit
									Source of Variation	SS	df	MS	F	P-value	F crit		Between Groups	6832.96	11	621.178	4.83517	0.00570724	2.71733
									Between Groups	4350.22	12	362.518	4.38413	0.0042959	2.47531		Within Groups	1541.65	12	128.471
									Within Groups	1240.33	15	82.6886
																	Total	8374.61	23
									Total	5590.55	27

## Sheet: fig 7E2L
fig 7E2 left
	average speed (um/min): extension
	3h									6h								12h
	DL	DM	VM	VL						DL	DM	VM	VL					DL	DM	VM	VL
	1.59	1.4	1.9	1.51						1.71	1.96	1.61	1.7					0.98	0.92	0.67	0.85
	1.11	1.62	1.3	1.3						1.62	1.62	1.74	1.74					0.72	0.1	1.16	0.82
	1.35	1.58	1.06	1.2						1.36	1.84	1.42	2.08					1.2	0.69	0.93	0.91
	1.43	1.9	1.37	1.52
average	1.37	1.625	1.4075	1.3825					average	1.56333	1.80667	1.59	1.84				average	0.966667	0.57	0.92	0.86
count	4	4	4	4					count	3	3	3	3				count	3	3	3	3
sd	0.2	0.206801	0.354154	0.158403					sd	0.181751	0.172434	0.160935	0.208806				sd	0.240278	0.422966	0.245153	0.0458258
sem	0.1	0.103401	0.177077	0.0792017					sem	0.104934	0.0995546	0.0929157	0.120554				sem	0.138724	0.244199	0.141539	0.0264575
t test		0.126645	0.859774	0.925133					t test		0.167806	0.858371	0.158489				t test		0.230702	0.825409	0.492107
		n.s.	n.s.	n.s.							n.s.	n.s.	n.s.						n.s.	n.s.	n.s.
	Anova: Single Factor								Anova: Single Factor								Anova: Single Factor
	SUMMARY								SUMMARY								SUMMARY
	Groups	Count	Sum	Average	Variance				Groups	Count	Sum	Average	Variance				Groups	Count	Sum	Average	Variance
	Column 1	4	5.48	1.37	0.04				Column 1	3	4.69	1.56333	0.0330333				Column 1	3	2.9	0.966667	0.0577333
	Column 2	4	6.5	1.625	0.0427667				Column 2	3	5.42	1.80667	0.0297333				Column 2	3	1.71	0.57	0.1789
	Column 3	4	5.63	1.4075	0.125425				Column 3	3	4.77	1.59	0.0259				Column 3	3	2.76	0.92	0.0601
	Column 4	4	5.53	1.3825	0.0250917				Column 4	3	5.52	1.84	0.0436				Column 4	3	2.58	0.86	0.0021
	ANOVA								ANOVA								ANOVA
	Source of Variation	SS	df	MS	F	P-value	F crit		Source of Variation	SS	df	MS	F	P-value	F crit		Source of Variation	SS	df	MS	F	P-value	F crit
	Between Groups	0.173325	3	0.057775	0.990641	0.430101	3.49029		Between Groups	0.185267	3	0.0617556	1.86761	0.213407	4.06618		Between Groups	0.285825	3	0.095275	1.27529	0.346761	4.06618
	Within Groups	0.69985	12	0.0583208					Within Groups	0.264533	8	0.0330667					Within Groups	0.597667	8	0.0747083
	Total	0.873175	15						Total	0.4498	11						Total	0.883492	11
									Anova: Single Factor								Anova: Single Factor
									SUMMARY								SUMMARY
									Groups	Count	Sum	Average	Variance				Groups	Count	Sum	Average	Variance
									Column 1	4	5.48	1.37	0.04				Column 1	3	4.69	1.56333	0.0330333
									Column 2	4	6.5	1.625	0.0427667				Column 2	3	5.42	1.80667	0.0297333
									Column 3	4	5.63	1.4075	0.125425				Column 3	3	4.77	1.59	0.0259
									Column 4	4	5.53	1.3825	0.0250917				Column 4	3	5.52	1.84	0.0436
									Column 5	0	0	#DIV/0!	#DIV/0!				Column 5	0	0	#DIV/0!	#DIV/0!
									Column 6	0	0	#DIV/0!	#DIV/0!				Column 6	0	0	#DIV/0!	#DIV/0!
									Column 7	0	0	#DIV/0!	#DIV/0!				Column 7	0	0	#DIV/0!	#DIV/0!
									Column 8	0	0	#DIV/0!	#DIV/0!				Column 8	0	0	#DIV/0!	#DIV/0!
									Column 9	0	0	#DIV/0!	#DIV/0!				Column 9	3	2.9	0.966667	0.0577333
									Column 10	3	4.69	1.56333	0.0330333				Column 10	3	1.71	0.57	0.1789
									Column 11	3	5.42	1.80667	0.0297333				Column 11	3	2.76	0.92	0.0601
									Column 12	3	4.77	1.59	0.0259				Column 12	3	2.58	0.86	0.0021
									Column 13	3	5.52	1.84	0.0436
																	ANOVA
									ANOVA								Source of Variation	SS	df	MS	F	P-value	F crit
									Source of Variation	SS	df	MS	F	P-value	F crit		Between Groups	5.0212	11	0.456472	6.35313	0.00171548	2.71733
									Between Groups	0.800117	12	0.0666764	1.03708	0.465818	2.47531		Within Groups	0.8622	12	0.07185
									Within Groups	0.964383	15	0.0642922
																	Total	5.8834	23
									Total	1.7645	27

## Sheet: fig 7E2R
fig 7E2 right
	average speed (um/min): extension
	3h									6h									12h
	DL	DM	VM	VL						DL	DM	VM	VL						DL	DM	VM	VL
	1.68	1.32	1.6	1.28						1.66	2.08	1.72	1.8						0.98	0.88	0.89	0.96
	1.49	1.56	1.52	1.5						1.72	1.5	1.4	1.41						1.08	0.94	0.7	0.72
	1.52	1.8	1.8	1.16						1.98	1.22	2.12	1.34						0.86	1.22	0.98	1.06
	1.28	1.5	1.16	1.78
average	1.4925	1.545	1.52	1.43					average	1.78667	1.6	1.74667	1.51667					average	0.973333	1.01333	0.856667	0.913333
count	4	4	4	4					count	3	3	3	3					count	3	3	3	3
sd	0.164393	0.198242	0.267333	0.272519					sd	0.170098	0.438634	0.36074	0.247857					sd	0.110151	0.181475	0.142945	0.174738
sem	0.0821964	0.0991211	0.133666	0.13626					sem	0.0982061	0.253246	0.208273	0.143101					sem	0.0635959	0.104775	0.0825295	0.100885
t test		0.697636	0.866646	0.708073					t test		0.529709	0.870528	0.194765					t test		0.760516	0.325513	0.641324
		n.s.	n.s.	n.s.							n.s.	n.s.	n.s.							n.s.	n.s.	n.s.
	Anova: Single Factor								Anova: Single Factor									Anova: Single Factor
	SUMMARY								SUMMARY									SUMMARY
	Groups	Count	Sum	Average	Variance				Groups	Count	Sum	Average	Variance					Groups	Count	Sum	Average	Variance
	Column 1	4	5.97	1.4925	0.027025				Column 1	3	5.36	1.78667	0.0289333					Column 1	3	2.92	0.973333	0.0121333
	Column 2	4	6.18	1.545	0.0393				Column 2	3	4.8	1.6	0.1924					Column 2	3	3.04	1.01333	0.0329333
	Column 3	4	6.08	1.52	0.0714667				Column 3	3	5.24	1.74667	0.130133					Column 3	3	2.57	0.856667	0.0204333
	Column 4	4	5.72	1.43	0.0742667				Column 4	3	4.55	1.51667	0.0614333					Column 4	3	2.74	0.913333	0.0305333
	ANOVA								ANOVA									ANOVA
	Source of Variation	SS	df	MS	F	P-value	F crit		Source of Variation	SS	df	MS	F	P-value	F crit			Source of Variation	SS	df	MS	F	P-value	F crit
	Between Groups	0.0293688	3	0.00978958	0.184658	0.904781	3.49029		Between Groups	0.143025	3	0.047675	0.461855	0.716646	4.06618			Between Groups	0.042425	3	0.0141417	0.589032	0.639187	4.06618
	Within Groups	0.636175	12	0.0530146					Within Groups	0.8258	8	0.103225						Within Groups	0.192067	8	0.0240083
	Total	0.665544	15						Total	0.968825	11							Total	0.234492	11
	Total	0.663981	15						Total	0.970642	11
									Anova: Single Factor									Anova: Single Factor
									SUMMARY									SUMMARY
									Groups	Count	Sum	Average	Variance					Groups	Count	Sum	Average	Variance
									Column 1	4	5.97	1.4925	0.027025					Column 1	3	5.36	1.78667	0.0289333
									Column 2	4	6.18	1.545	0.0393					Column 2	3	4.8	1.6	0.1924
									Column 3	4	6.08	1.52	0.0714667					Column 3	3	5.24	1.74667	0.130133
									Column 4	4	5.72	1.43	0.0742667					Column 4	3	4.55	1.51667	0.0614333
									Column 5	0	0	#DIV/0!	#DIV/0!					Column 5	0	0	#DIV/0!	#DIV/0!
									Column 6	0	0	#DIV/0!	#DIV/0!					Column 6	0	0	#DIV/0!	#DIV/0!
									Column 7	0	0	#DIV/0!	#DIV/0!					Column 7	0	0	#DIV/0!	#DIV/0!
									Column 8	0	0	#DIV/0!	#DIV/0!					Column 8	0	0	#DIV/0!	#DIV/0!
									Column 9	0	0	#DIV/0!	#DIV/0!					Column 9	0	0	#DIV/0!	#DIV/0!
									Column 10	3	5.36	1.78667	0.0289333					Column 10	3	2.92	0.973333	0.0121333
									Column 11	3	4.8	1.6	0.1924					Column 11	3	3.04	1.01333	0.0329333
									Column 12	3	5.24	1.74667	0.130133					Column 12	3	2.57	0.856667	0.0204333
									Column 13	3	4.55	1.51667	0.0614333					Column 13	3	2.74	0.913333	0.0305333
									ANOVA									ANOVA
									Source of Variation	SS	df	MS	F	P-value	F crit			Source of Variation	SS	df	MS	F	P-value	F crit
									Between Groups	0.360496	12	0.0300414	0.308227	0.976892	2.47531			Between Groups	3.32472	12	0.27706	2.99416	0.0396738	2.78757
									Within Groups	1.46198	15	0.097465						Within Groups	1.01787	11	0.0925333
									Total	1.82247	27							Total	4.34258	23
